# Supplementary material
Source: PubMed Central journal article supplement (PMC2685896)
Supplement: NIHMS4667-supplement-Supp_Fig2.pdf [file NIHMS4667-supplement-Supp_Fig2.pdf]

**A**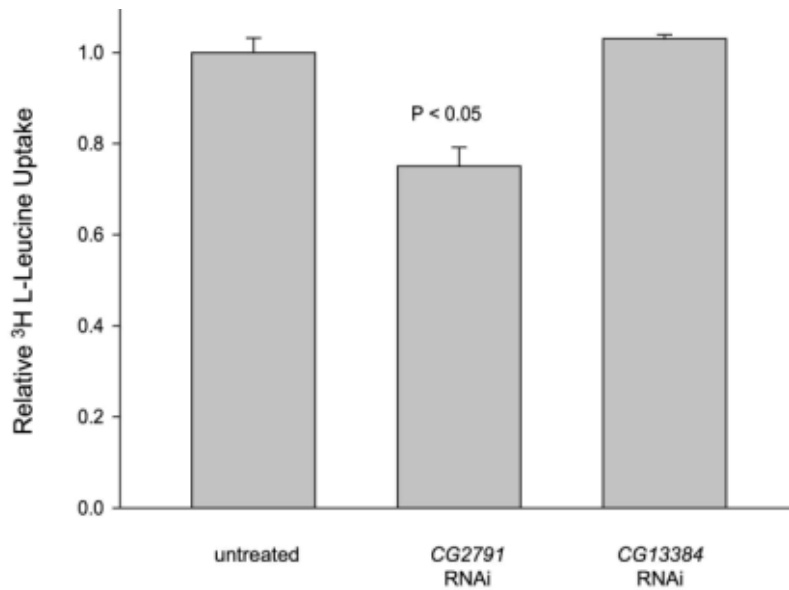**B**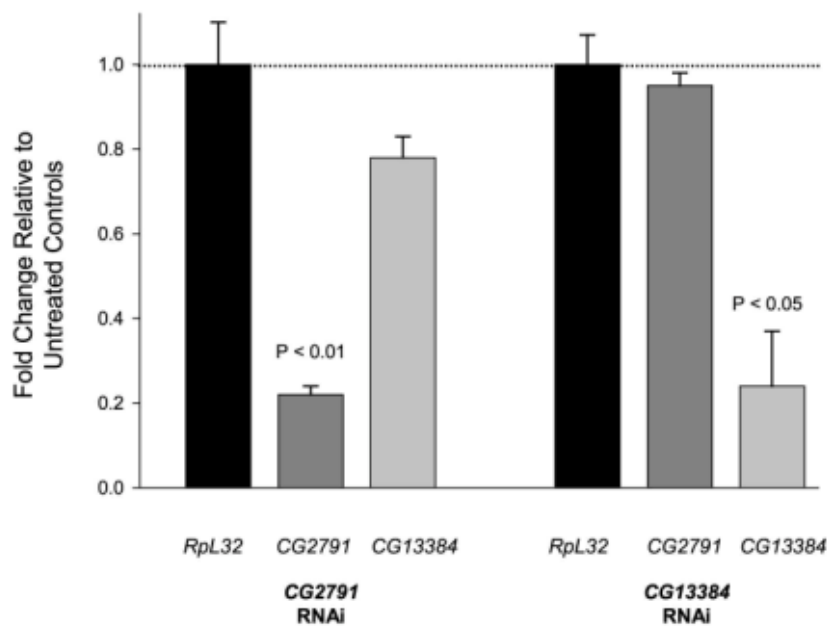

**Supplementary Figure 2. Specificity of RNAi experiments (A)** BCH-sensitive mediated uptake of <sup>3</sup>H L-Leucine in sodium-free conditions in control cells and in cells treated with RNAi to knock down the fly genes, *CG2791/cd98hc* and the PAT transporter *CG13384*. In contrast to the 25% reduction in system L transport observed when CD98hc was knocked down compared to untreated cells, there was no significant effect when CG13384 was knocked down ( $n \geq 3$  for all samples). Knockdown of a second PAT transporter, path, also has no effect on System L transport (data not shown). **(B)** Graphs show levels of *cd98hc*, *CG13384* and control *Rpl32* transcripts relative to untreated cells in multiple knockdown experiments, as measured by Q-RT-PCR. There was a significant reduction of roughly 80% for each transcript targeted by RNAi, i.e., *CG2791* RNAi and *CG13384*. Experiments were performed in triplicate.
