# Supplementary material
Source: PubMed Central journal article supplement (PMC2685896)
Supplement: NIHMS4667-supplement-Supp_Fig3.pdf [file NIHMS4667-supplement-Supp_Fig3.pdf]

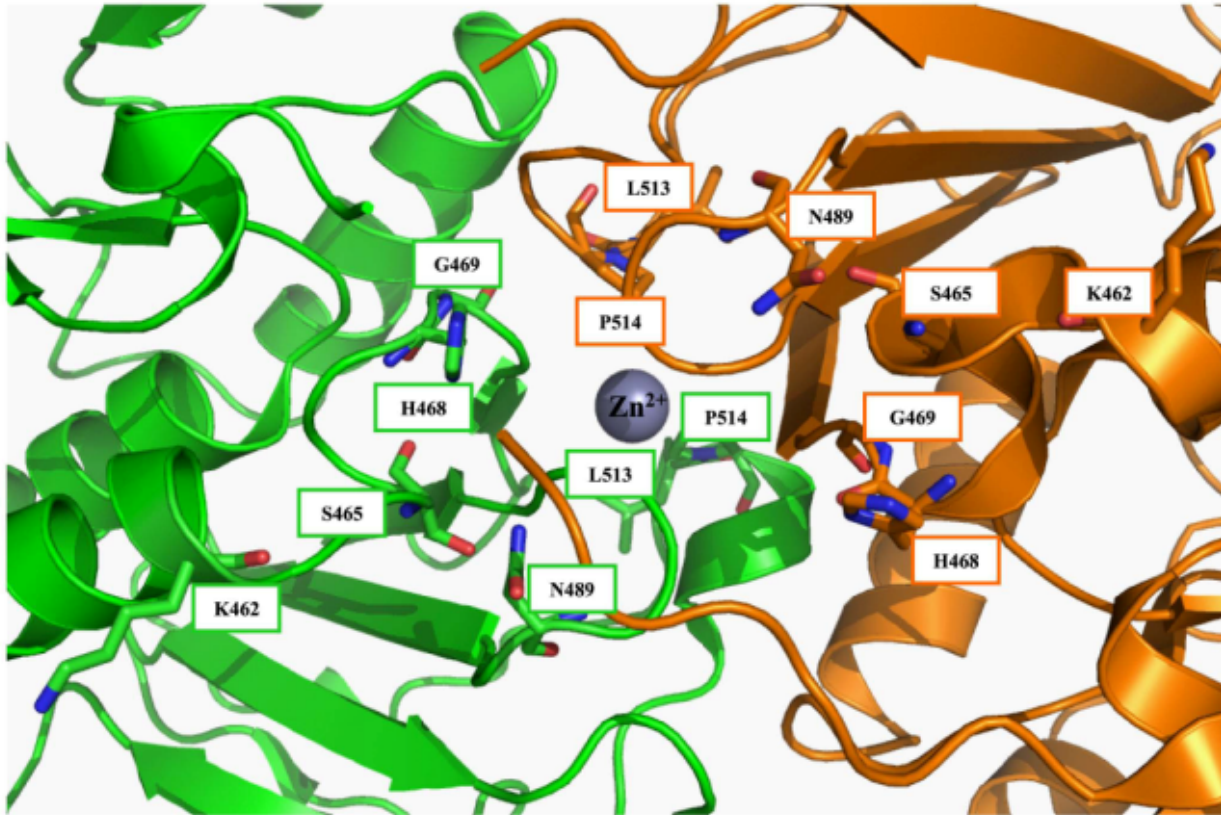

**Supplementary Figure 3. Conservation of hydrophobic residues at the human CD98hc extracellular dimer interface** A more detailed bottom view of the structure of the human CD98hc extracellular domain dimer interface, derived from the crystal structure in PDB ID 2DH3. The region of the human CD98hc dimer surrounding the central zinc atom (in grey) is in cartoon representation. The two components of the dimer are painted respectively green and orange. Residues conserved across the human, mouse, zebrafish and *Drosophila* sequences are represented as sticks, their atoms painted green or orange for carbon, blue for nitrogen, and red for oxygen. Hydrogen atoms are not shown. The labels bear the residue numbers of the *Drosophila* sequence. The image was generated with the WHISCY server [29] and PyMOL [30].
